# Supplementary material for: Carbonic Anhydrase IX-Targeted α-Radionuclide Therapy with 225Ac Inhibits Tumor Growth in a Renal Cell Carcinoma Model
Source: MDPI journal article supplement (doi:10.3390/ph15050570), 2022-05-02
Supplement: s1 [file s1]

# Supplementary Material

## *Carbonic anhydrase IX-targeted $\alpha$ -radionuclide therapy with $^{225}\text{Ac}$ inhibits tumor growth in a renal cell carcinoma model*

Robin I.J. Merks<sup>1,2\*</sup>, Mark Rijpkema<sup>1</sup>, Gerben M. Franssen<sup>1</sup>, Annemarie Kip<sup>1</sup>, Bart Smeets<sup>3</sup>, Alfred Morgenstern<sup>4</sup>, Frank Bruchertseifer<sup>4</sup>, Eddie Yan<sup>5</sup>, Michael P. Wheatcroft<sup>5</sup>, Egbert Oosterwijk<sup>2</sup>, Peter F.A. Mulders<sup>2</sup>, Sandra Heskamp<sup>1</sup>

<sup>1</sup>Department of Medical Imaging: Nuclear Medicine, Radboudumc, Nijmegen, The Netherlands <sup>2</sup>Department of Urology, Radboudumc, Nijmegen, The Netherlands

<sup>3</sup>Department of Pathology, Radboudumc, Nijmegen, The Netherlands

<sup>4</sup>European Commission, Joint Research Centre (JRC), Karlsruhe, Germany

<sup>5</sup>Telix Pharmaceuticals Limited, Melbourne, Australia

Correspondence: Robin.Merks@radboudumc.nl;

**Table S1.**

The weight, the absolute uptake, and relative uptake over time of the spleen in mice treated with 50 kBq  $^{225}\text{Ac}$ -hG250.

| Mouse | Day 1      |                       |                         |  | Day 3      |                       |                         |  | Day 7      |                       |                         |
|-------|------------|-----------------------|-------------------------|--|------------|-----------------------|-------------------------|--|------------|-----------------------|-------------------------|
|       | Weight (g) | Absolute Uptake (%ID) | Relative Uptake (%ID/g) |  | Weight (g) | Absolute Uptake (%ID) | Relative Uptake (%ID/g) |  | Weight (g) | Absolute Uptake (%ID) | Relative Uptake (%ID/g) |
| 1     | 0.0716     | 0.390                 | 5.450                   |  | 0.0266     | 0.236                 | 8.864                   |  | 0.0138     | 0.189                 | 13.687                  |
| 2     | 0.0729     | 0.443                 | 6.083                   |  | 0.031      | 0.311                 | 10.024                  |  | 0.0178     | 0.315                 | 17.679                  |
| 3     | 0.0782     | 0.484                 | 6.185                   |  | 0.0475     | 0.305                 | 6.415                   |  | 0.0147     | 0.268                 | 18.218                  |
| 4     | 0.0699     | 0.414                 | 5.928                   |  | 0.0413     | 0.421                 | 10.198                  |  | 0.1703     | 0.155                 | 0.913                   |
| 5     | 0.0639     | 0.334                 | 5.228                   |  | 0.0573     | 0.546                 | 9.524                   |  | 0.0182     | 0.260                 | 14.273                  |



**Table S2.**

The weight, the absolute uptake, and relative uptake over time of the spleen in mice treated with 0.2 MBq  $^{177}\text{Lu}$ -hG250.

| Mouse | Day 1      |                       |                         |  | Day 3      |                       |                         |  | Day 7      |                       |                         |
|-------|------------|-----------------------|-------------------------|--|------------|-----------------------|-------------------------|--|------------|-----------------------|-------------------------|
|       | Weight (g) | Absolute Uptake (%ID) | Relative Uptake (%ID/g) |  | Weight (g) | Absolute Uptake (%ID) | Relative Uptake (%ID/g) |  | Weight (g) | Absolute Uptake (%ID) | Relative Uptake (%ID/g) |
| 1     | 0.0802     | 0.502                 | 6.259                   |  | 0.1198     | 0.453                 | 3.784                   |  | 0.1571     | 0.399                 | 2.538                   |
| 2     | 0.1038     | 0.513                 | 4.947                   |  | 0.1071     | 0.499                 | 4.655                   |  | 0.1276     | 0.332                 | 2.601                   |
| 3     | 0.0822     | 0.360                 | 4.374                   |  | 0.0798     | 0.338                 | 4.235                   |  | 0.2067     | 0.430                 | 2.078                   |
| 4     | 0.1586     | 0.405                 | 2.556                   |  | 0.2136     | 1.044                 | 4.889                   |  | 0.1112     | 0.310                 | 2.789                   |
| 5     | 0.1135     | 0.333                 | 2.930                   |  | 0.1091     | 0.408                 | 3.744                   |  | 0.1618     | 0.490                 | 3.026                   |



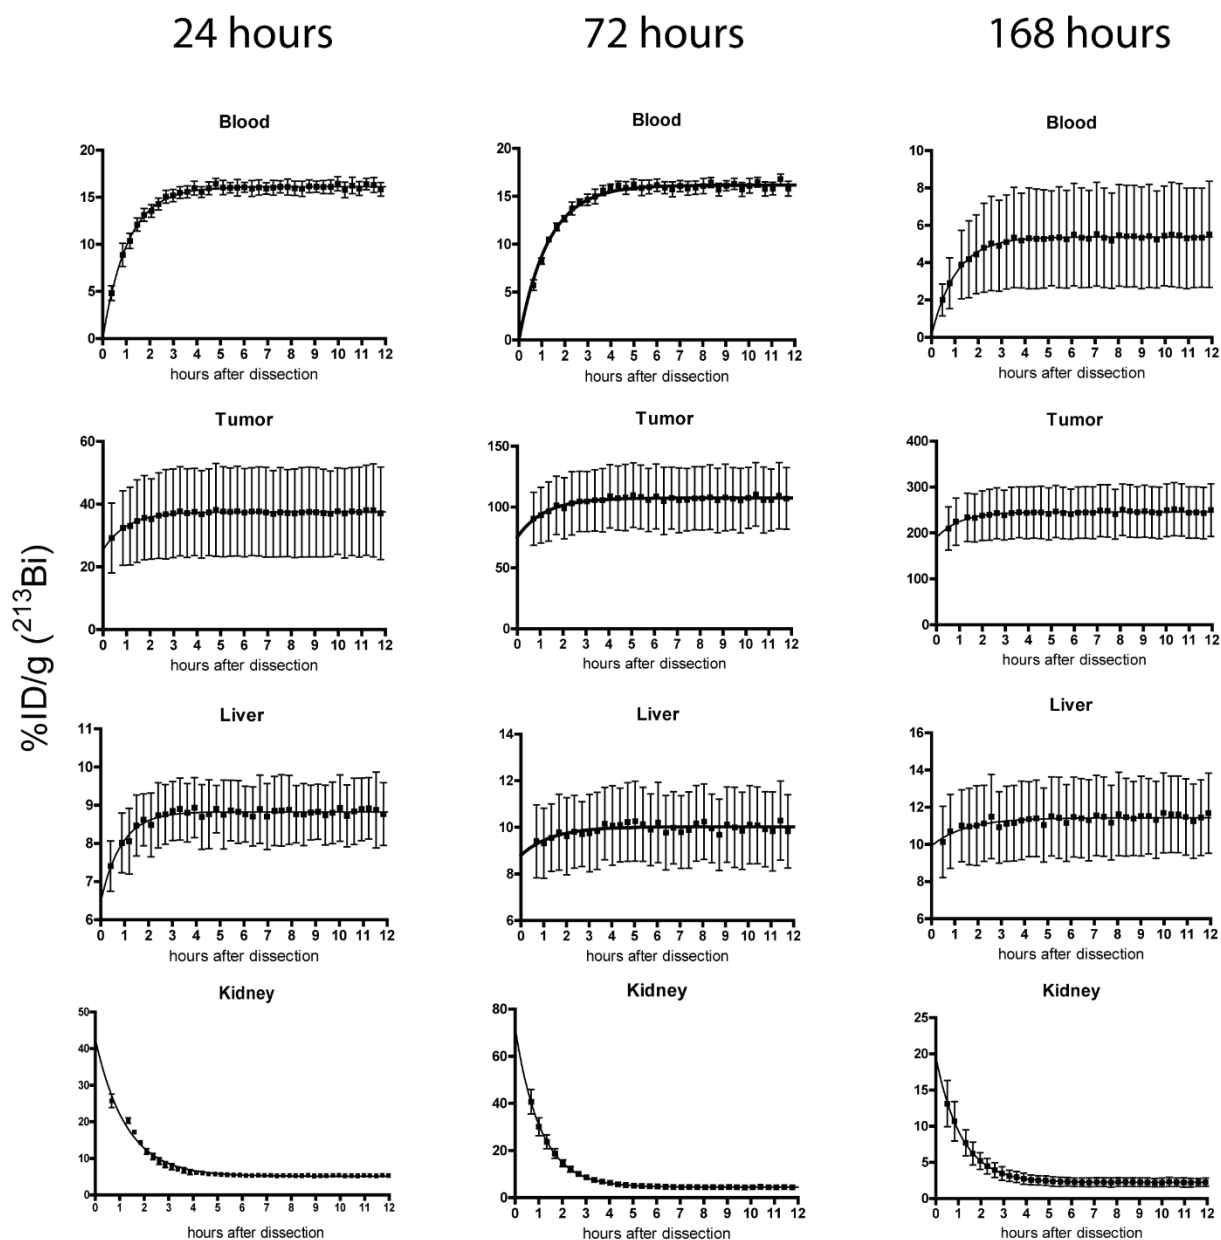

**Figure S1.** Continuous measurement of  $^{213}\text{Bi}$  in organs of interest (blood, tumor, liver, and kidney) at three time points post-administration. All data points are based on the mean  $\pm$  SD on that time point (n=5). The curve was obtained by applying a one-phase decay fit in all groups. The Y-axis on all graphs represents %ID/g of  $^{213}\text{Bi}$ .



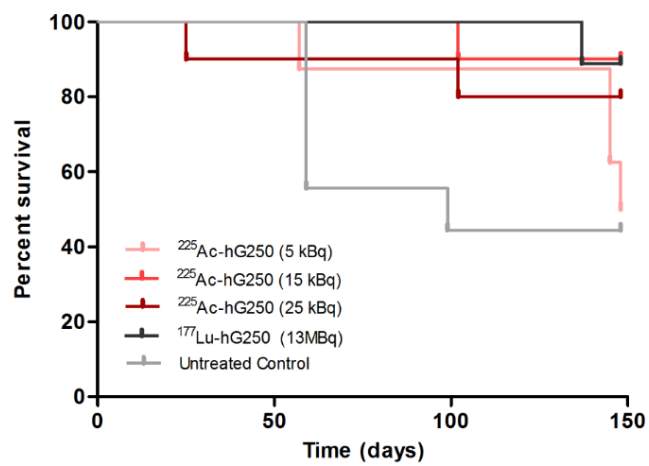

**Figure S2.** Survival curves of SK-RC-52 tumor-bearing mice, either untreated or treated with different activity doses of  $^{225}\text{Ac}$ -hG250 or  $^{177}\text{Lu}$ -hG250.



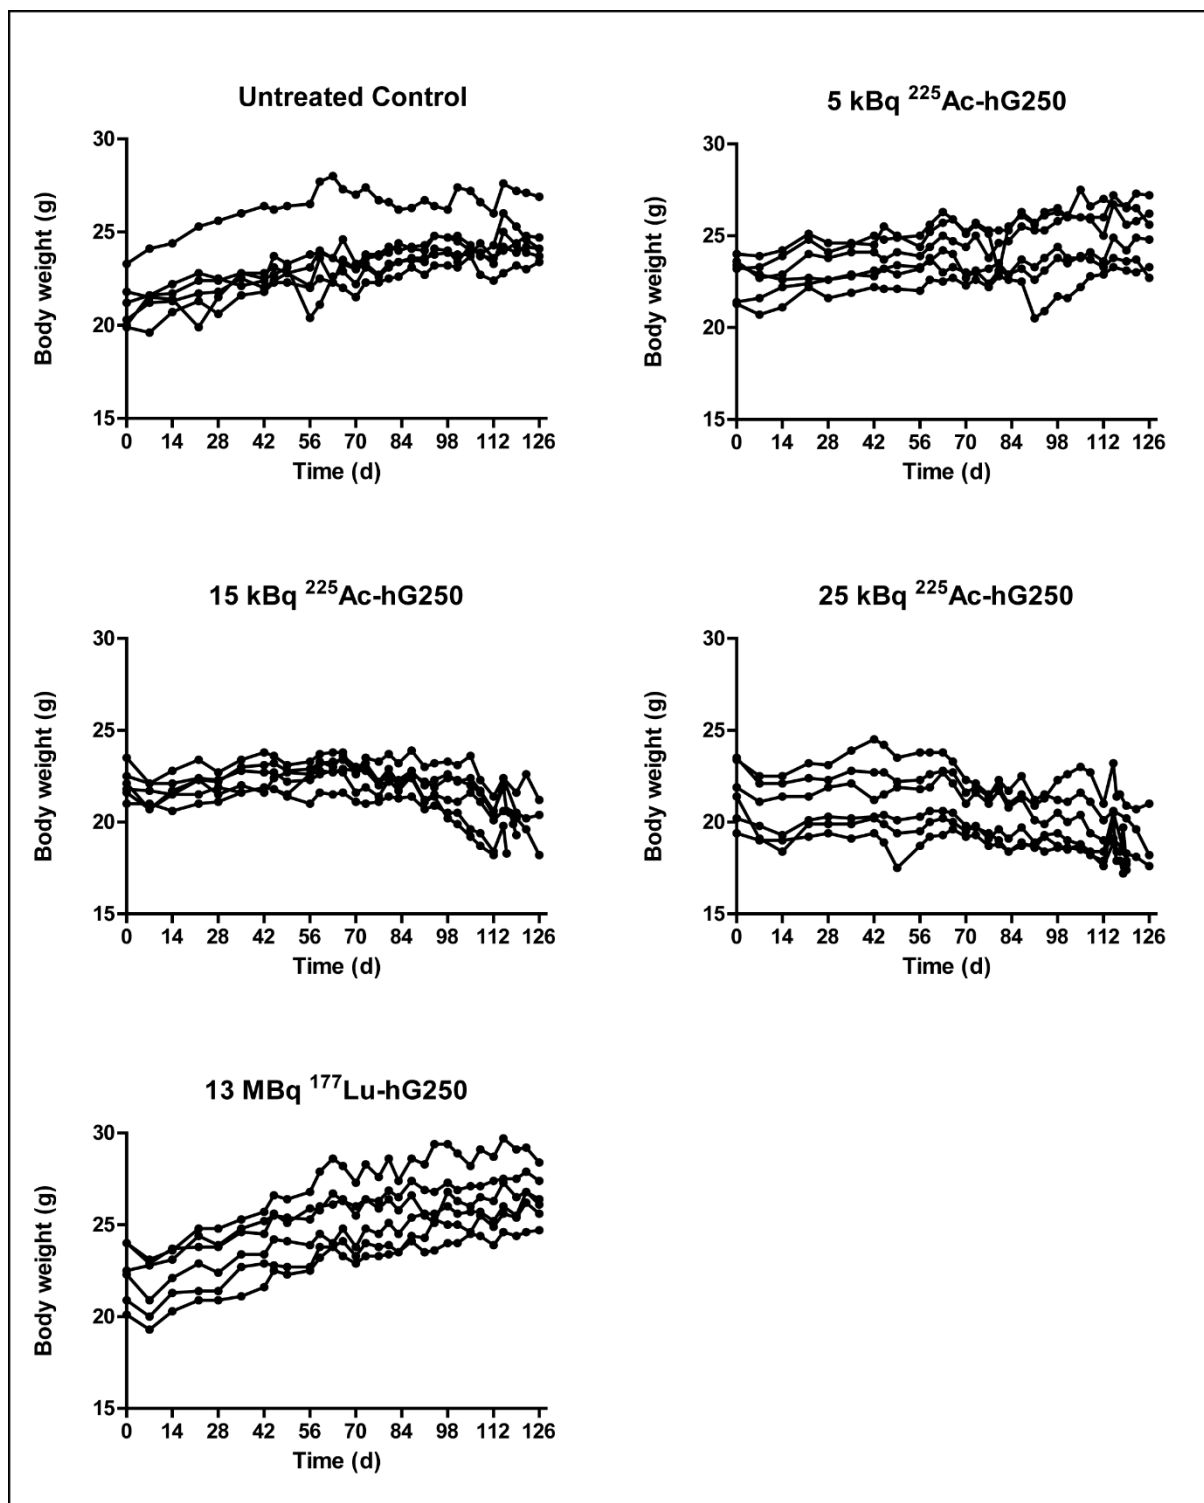

**Figure S3.** Absolute body weight over time in non-tumor-bearing mice either untreated or treated with different doses of  $^{225}\text{Ac}$ -hG250 or  $^{177}\text{Lu}$ -hG250.



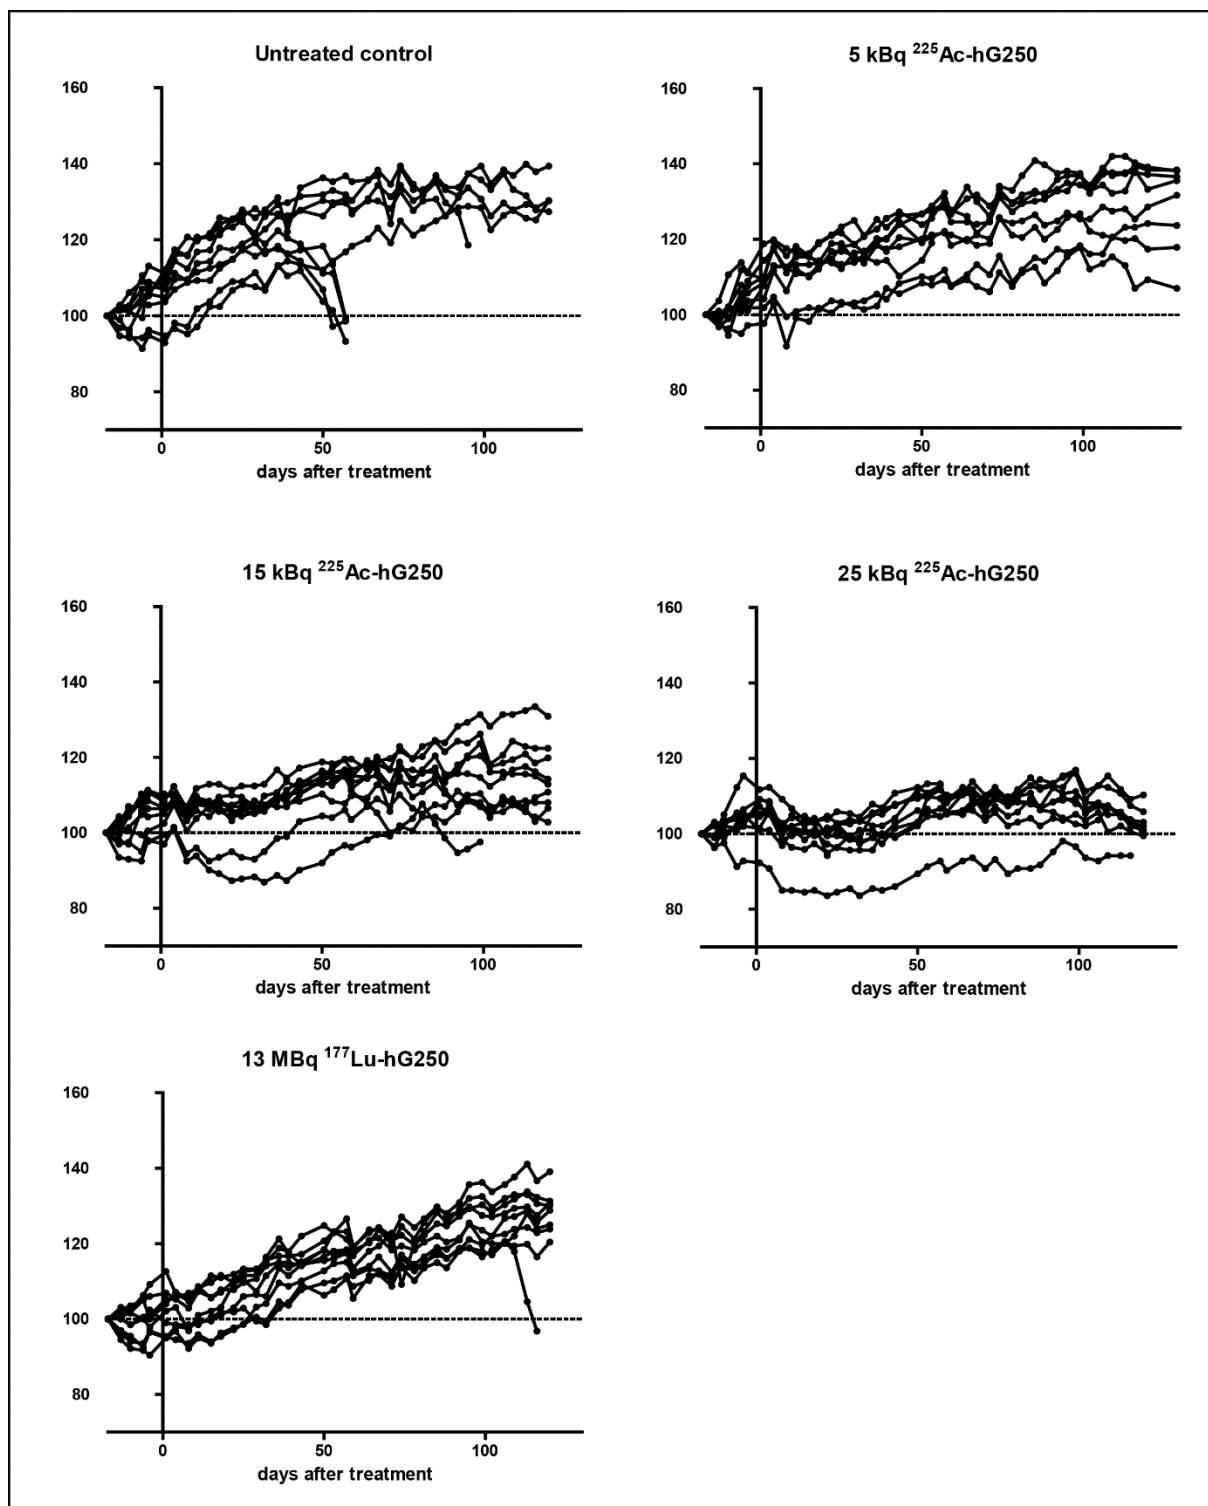

**Figure S4.** Relative body weight over time in tumor-bearing mice either untreated or treated with different doses of  $^{225}\text{Ac}$ -hG250 or  $^{177}\text{Lu}$ -hG250.



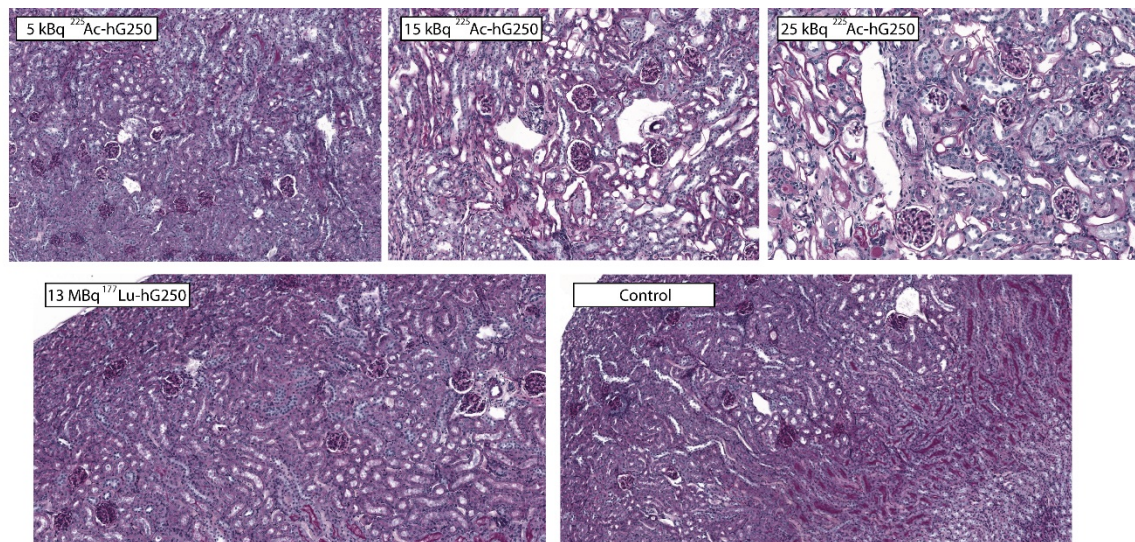

**Figure S5.** Representative kidney slices stained with periodic acid-Schiff from non-tumor-bearing mice either untreated or treated with different doses of  $^{225}\text{Ac}$ -hG250 or  $^{177}\text{Lu}$ -hG250, 18 weeks post-treatment. Mice treated with 15 and 25 kBq  $^{225}\text{Ac}$ -hG250 show interstitial fibrosis and tubular atrophy in the kidney.
